# Supplementary material for: Ferrocenylated 1,3,5-triphenylbenzenes for the electrochemical detection of various cations or anions
Source: Royal Society of Chemistry journal article supplement (doi:10.1039/d1dt01287h), 2021-01-01
Supplement: d1dt01287h1.pdf [file d1dt01287h1.pdf]

# **Ferrocenylated 1,3,5-triphenylbenzenes for the electrochemical detection of various cations or anions**

## **ELECTRONIC SUPPORTING INFORMATION (ESI)**

Artur Kasprzak<sup>a\*</sup>, Natalia Kasprzak<sup>b</sup>, Agata Kowalczyk<sup>b</sup>, Anna M. Nowicka<sup>b\*</sup>

<sup>a</sup> Faculty of Chemistry, Warsaw University of Technology, Noakowskiego Str. 3, 00-664 Warsaw, Poland

<sup>b</sup> Faculty of Chemistry, University of Warsaw, Pasteura Str. 1, 02-093 Warsaw, Poland

\* corresponding authors e-mails: [akasprzak@ch.pw.edu.pl](mailto:akasprzak@ch.pw.edu.pl) (Kasprzak), [anowicka@chem.uw.edu.pl](mailto:anowicka@chem.uw.edu.pl) (Nowicka)

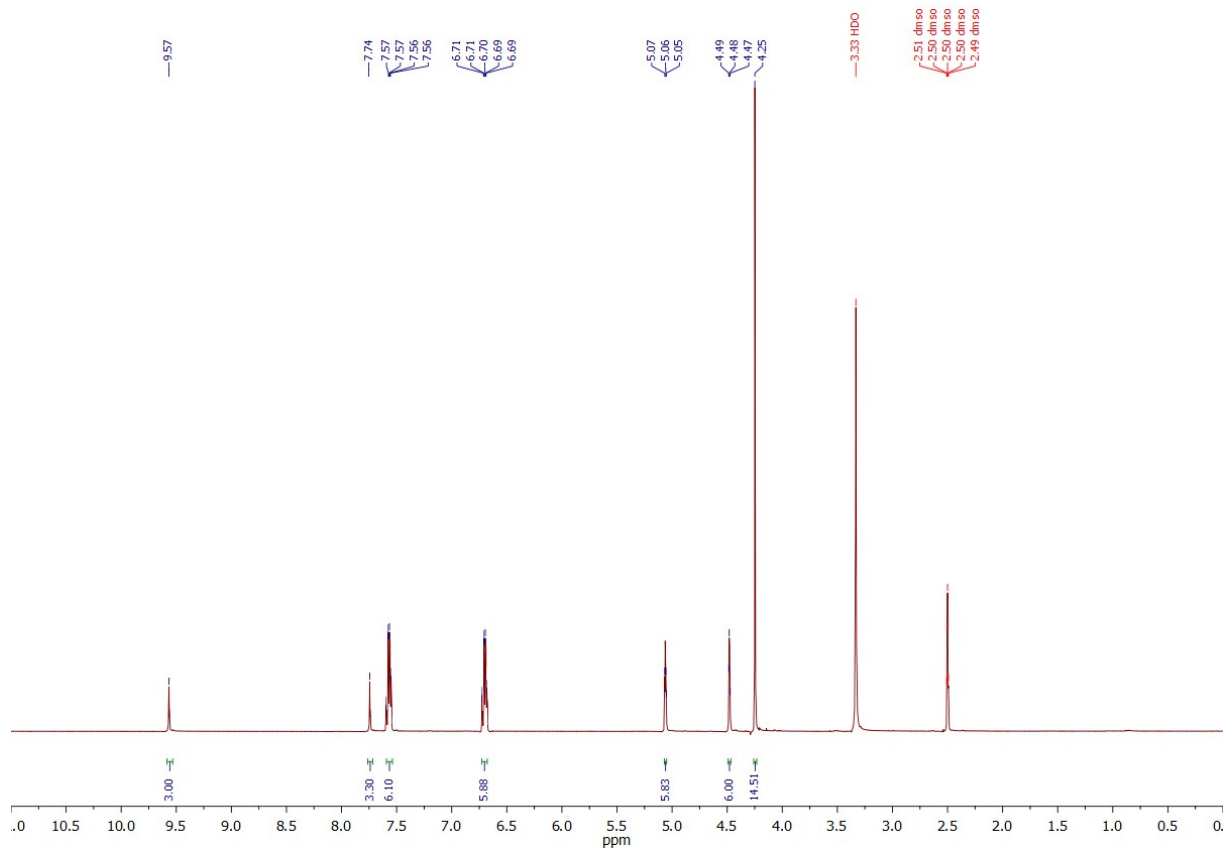

**Figure S1.**  $^1\text{H}$  NMR (DMSO- $d_6$ , 500 MHz) spectrum of **Fc3**.

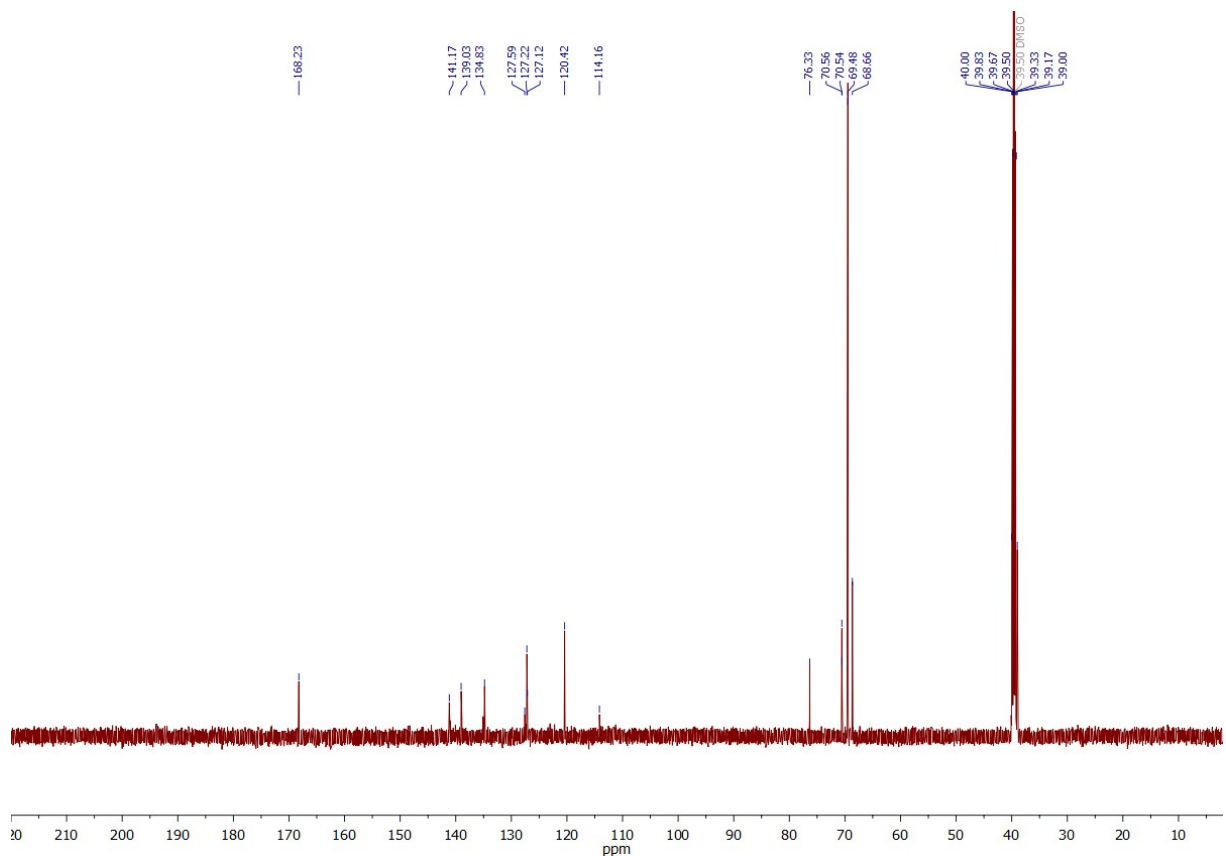

**Figure S2.**  $^{13}\text{C}$  NMR (DMSO- $d_6$ , 125 MHz) spectrum of **Fc3**.
